# Supplementary material for: Rationally designed structure of mesoporous carbon hollow microspheres to acquire excellent microwave absorption performance
Source: Royal Society of Chemistry journal article supplement (doi:10.1039/d1ra00465d), 2021-01-01
Supplement: d1ra00465d1.pdf [file d1ra00465d1.pdf]

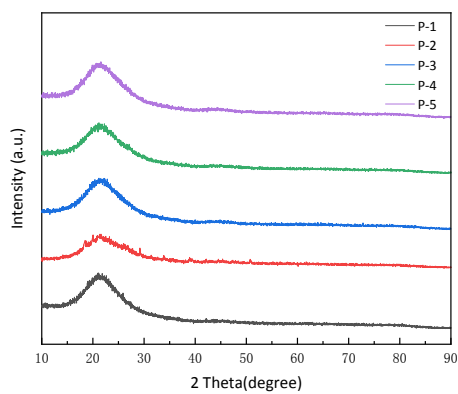

Fig. S1 XRD patterns of samples P1-P5.

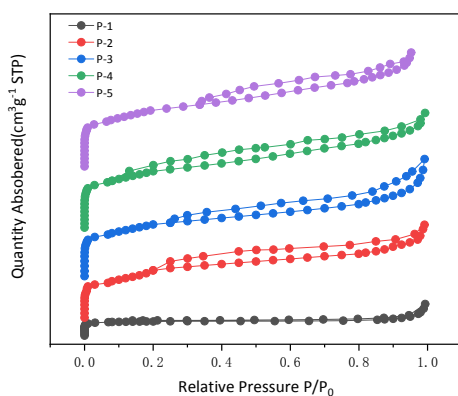

Fig. S2 N<sub>2</sub> adsorption isotherms of samples P-1 to P-5.

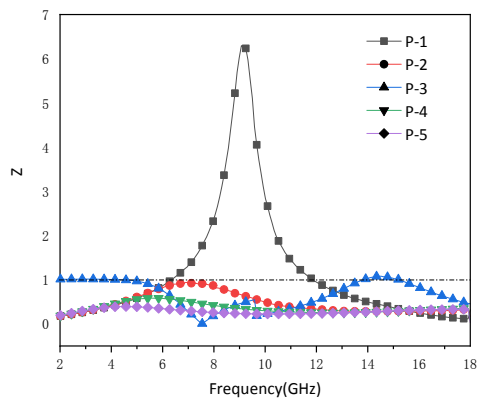

Fig. S3 Modulus of Z of samples P-1 to P-5.

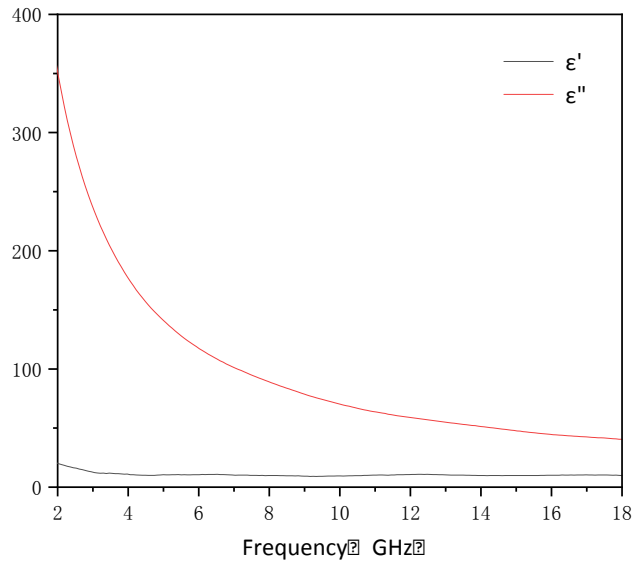

Fig. S4 Complex permittivity values of P3-20wt%.

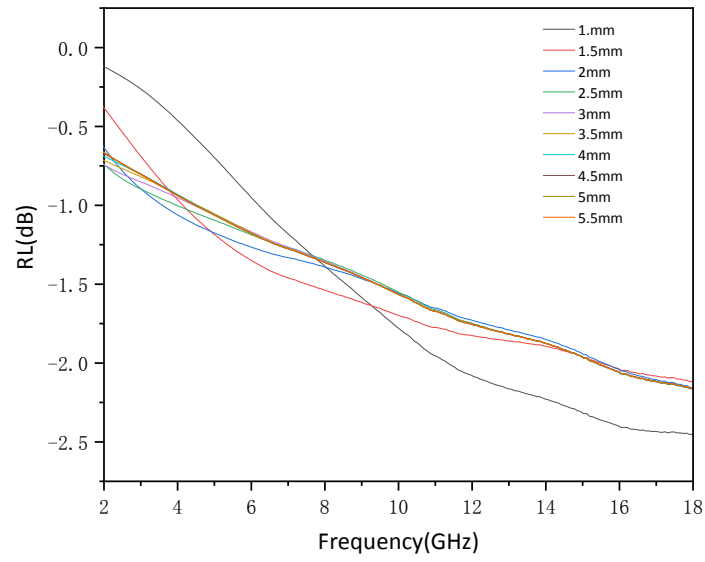

Fig. S5 Microwave reflection loss values at different thickness of different frequency of P3-25wt%.
